# Supplementary material for: Chert procurement for inferring Neanderthal mobility in central western Iberia
Source: Research Square preprint supplement (doi:10.21203/rs.3.rs-7684583/v1), 2025-10-27
Supplement: Supplementary file 1 [file 6df8bb8f1a5bd585253bff6e.xlsx]

## Sheet: Authors and paper information
Chert procurement for inferring Neanderthal mobility in central western Iberia
Archaeological and Anthropological Sciences.
Special issue: Settlement Patterns Dynamics of the Middle Paleolithic and Middle Stone Age
Telmo Pereira
Instituto de Ciências Sociais, Universidade do Minho, PORTUGAL
Instituto Politécnico de Tomar, PORTUGAL
CGeo - Centro de Geociências da Universidade de Coimbra, PORTUGAL
UNIARQ - Centro de Arqueologia da Universidade de Lisboa, PORTUGAL
https://orcid.org/0000-0002-7588-2090
Ana Abrunhosa
Material Culture PaleoLab, The Leon Recannati Institute of Maritime Studies School of Archaeology and Maritime Cultures, University of Haifa. ISRAEL
ICArEHB - Interdisciplinary Center for Archaeology and Evolution of Human Behaviour, Universidade do Algarve, PORTUGAL
https://orcid.org/0000-0002-9720-2623
Eduardo Paixão
ICArEHB - Interdisciplinary Center for Archaeology and Evolution of Human Behaviour, Universidade do Algarve, PORTUGAL
https://orcid.org/0000-0003-0850-1806
Milena Carvalho
ICArEHB - Interdisciplinary Center for Archaeology and Evolution of Human Behaviour, Universidade do Algarve, PORTUGAL
https://orcid.org/0000-0001-9642-9239
Jonathan Haws
Department of Anthropology, University of Louisville, USA
ICArEHB - Interdisciplinary Center for Archaeology and Evolution of Human Behaviour, Universidade do Algarve, PORTUGAL
https://orcid.org/0000-0002-2047-4524
Michael Benedetti
Department of Earth and Ocean Sciences, University of North Carolina Wilmington, USA
ICArEHB - Interdisciplinary Center for Archaeology and Evolution of Human Behaviour, Universidade do Algarve, PORTUGAL
https://orcid.org/0000-0002-2900-887X
Eduardo Alves
IPFN - Instituto de Plasmas e Fusão Nuclear, Instituto Superior Técnico, Universidade de Lisboa, PORTUGAL
https://orcid.org/0000-0003-0633-8937
Luís Alves
C2TN - Centro de Ciências e Tecnologias Nucleares, Departamento de Engenharia e Ciências Nucleares, Instituto Superior Técnico, Universidade de Lisboa, PORTUGAL
https://orcid.org/0000-0001-5369-5019

## Sheet: Table 1. pXRF
Code	MgO	Al2O3	SiO2	P2O5	S	Cl	K2O	CaO	Ti	V	Cr	Mn	Fe	Ni	Cu	Zn	As	Rb	Sr	Y	Zr	Nb	Mo	Ag	Ba	W	Au	Pb
600GNC	< LOD	< LOD	100	0.0789	0.02	0.1597	0.0161	0.1202	0.0025	< LOD	0.0062	0.0046	0.1462	< LOD	0.0008	0.0006	< LOD	< LOD	< LOD	< LOD	< LOD	< LOD	< LOD	< LOD	< LOD	< LOD	< LOD	< LOD
601GNC	< LOD	< LOD	100	0.0862	0.1257	0.1618	0.0297	0.1996	0.0017	< LOD	0.0084	0.0037	0.1121	< LOD	0.0014	0.0009	< LOD	< LOD	< LOD	< LOD	< LOD	< LOD	0.0004	< LOD	< LOD	< LOD	< LOD	< LOD
602GNC	< LOD	0.1967	100	0.0882	0.0398	0.1985	0.0352	0.1492	0.0045	< LOD	0.0092	0.0039	0.1554	< LOD	0.0012	0.0008	< LOD	< LOD	< LOD	< LOD	< LOD	< LOD	0.0005	< LOD	< LOD	< LOD	< LOD	< LOD
603GNC	< LOD	0.3251	100	0.1057	0.0515	0.17	0.0323	0.1295	0.0044	< LOD	0.0046	0.0045	0.1491	< LOD	0.0012	0.0006	< LOD	< LOD	< LOD	< LOD	< LOD	< LOD	0.0006	0.002	< LOD	< LOD	0.0005	< LOD
604GNC	< LOD	0.2082	100	0.1078	0.0343	0.2558	0.0175	0.1013	< LOD	< LOD	0.0069	0.0041	0.637	< LOD	0.0009	0.0017	< LOD	< LOD	< LOD	< LOD	0.0041	< LOD	0.0004	< LOD	< LOD	< LOD	0.0006	< LOD
605GNC	< LOD	1.0891	100	0.1598	0.0416	0.2272	0.0676	0.1096	0.0046	< LOD	0.0075	0.0029	0.3558	< LOD	0.0012	0.0013	< LOD	< LOD	< LOD	< LOD	0.0012	< LOD	0.0003	< LOD	< LOD	< LOD	< LOD	< LOD
606GNC	< LOD	0.6969	100	0.2858	0.0394	0.8141	0.0645	0.1818	0.0075	< LOD	0.0064	0.0046	0.5002	< LOD	0.0011	0.0007	< LOD	0.0003	0.001	< LOD	0.0003	< LOD	< LOD	< LOD	< LOD	< LOD	0.0005	< LOD
607GNC	< LOD	0.6235	90.5432	0.1793	0.0115	0.4896	0.0729	0.1257	0.0083	0.0005	0.0058	0.004	0.1815	< LOD	0.001	0.0004	< LOD	< LOD	0.0005	< LOD	< LOD	< LOD	< LOD	< LOD	< LOD	< LOD	< LOD	< LOD
608GNC	1.3263	0.2658	87.9972	0.0906	0.241	0.2302	0.0232	0.2732	0.0058	0.0016	0.0061	0.0026	0.0728	< LOD	0.0013	0.0009	0.0003	< LOD	< LOD	< LOD	< LOD	< LOD	0.0005	< LOD	< LOD	< LOD	< LOD	< LOD
609GNC	1.2713	0.7123	84.7819	0.1775	0.0234	0.3766	0.0561	0.2651	0.0098	0.0034	0.0049	0.0034	0.0676	< LOD	0.0013	0.0007	< LOD	< LOD	< LOD	< LOD	< LOD	< LOD	< LOD	< LOD	< LOD	0.0005	< LOD	< LOD
610GNC	< LOD	2.0528	100	0.2367	0.055	0.1959	0.1028	0.1257	0.0089	< LOD	0.0059	0.0047	0.0852	< LOD	0.0012	0.0008	< LOD	< LOD	0.0005	< LOD	< LOD	< LOD	< LOD	< LOD	< LOD	< LOD	< LOD	< LOD
611GNC	< LOD	1.0592	100	0.205	0.0507	0.1297	0.0787	0.1392	0.0062	< LOD	0.0087	< LOD	0.083	< LOD	0.0012	0.001	< LOD	< LOD	< LOD	< LOD	< LOD	< LOD	< LOD	< LOD	< LOD	< LOD	< LOD	< LOD
612GNC	< LOD	0.2457	100	0.1496	0.2054	0.272	0.0241	0.2295	0.0054	< LOD	0.0066	0.0044	0.0833	< LOD	0.0009	0.0007	< LOD	< LOD	0.0004	< LOD	< LOD	< LOD	< LOD	< LOD	< LOD	< LOD	< LOD	< LOD
613GNC	< LOD	< LOD	100	0.1164	0.0413	0.32	< LOD	0.2159	0.0017	< LOD	0.0064	0.0036	0.0901	< LOD	0.0011	0.0014	< LOD	< LOD	0.0005	< LOD	< LOD	< LOD	< LOD	< LOD	< LOD	< LOD	< LOD	< LOD
614GNC	< LOD	0.2498	100	0.1047	0.1735	0.4711	0.0057	0.134	0.1329	< LOD	< LOD	0.3795	0.0609	0.005	0.0015	0.0014	< LOD	< LOD	0.0056	< LOD	0.0005	< LOD	0.0006	< LOD	0.4106	< LOD	< LOD	< LOD
615GNC	< LOD	< LOD	100	0.1379	0.0736	0.6218	< LOD	0.1662	0.1009	< LOD	< LOD	0.6403	0.0672	0.0068	0.0019	0.0015	< LOD	< LOD	0.0069	< LOD	0.0005	< LOD	0.0006	< LOD	0.3852	0.0005	< LOD	< LOD
616GNC	1.0118	0.1771	81.54	0.082	0.0761	0.3906	0.013	0.3078	0.0085	0.0029	0.0027	0.004	0.0614	< LOD	0.0013	0.001	< LOD	< LOD	< LOD	< LOD	< LOD	< LOD	0.0008	< LOD	< LOD	< LOD	< LOD	< LOD
617GNC	< LOD	0.4437	100	0.1134	0.1816	0.5069	0.0184	0.3787	0.0046	< LOD	0.0069	0.0054	0.081	< LOD	0.001	0.0009	< LOD	< LOD	< LOD	< LOD	< LOD	< LOD	< LOD	< LOD	< LOD	< LOD	< LOD	< LOD
618GNC	< LOD	0.8074	98.0509	0.1094	0.0546	0.1045	0.0625	0.069	0.0053	< LOD	0.006	0.0033	0.0972	< LOD	0.0012	0.0005	< LOD	< LOD	0.0004	0.0004	0.0003	< LOD	< LOD	< LOD	< LOD	< LOD	< LOD	< LOD
619GNC	< LOD	2.7059	98.6954	0.105	0.2566	0.17	0.1574	0.2144	0.0169	0.0001	0.0061	0.0049	1.3807	< LOD	0.0018	0.0016	0.001	< LOD	0.0004	< LOD	0.0005	< LOD	< LOD	< LOD	< LOD	< LOD	< LOD	< LOD
620GNC	< LOD	0.3086	100	0.1162	0.0599	0.2029	0.0199	0.1531	0.0049	< LOD	0.0032	0.0085	0.0951	< LOD	0.0014	0.001	< LOD	< LOD	< LOD	< LOD	< LOD	< LOD	< LOD	0.0016	< LOD	< LOD	< LOD	< LOD
621GNC	< LOD	1.116	99.61	0.2113	0.7385	0.1382	0.0382	0.5355	0.0208	< LOD	0.0036	0.0086	0.1065	< LOD	0.0018	0.0012	< LOD	< LOD	< LOD	< LOD	0.0003	< LOD	< LOD	0.002	< LOD	< LOD	< LOD	< LOD
622GNC	< LOD	0.7997	100	0.1275	0.6353	0.4307	0.0186	0.6479	0.0072	< LOD	0.0075	0.0029	0.0766	< LOD	0.0011	0.0006	< LOD	< LOD	0.0007	< LOD	< LOD	< LOD	< LOD	< LOD	< LOD	< LOD	< LOD	< LOD
623GNC	< LOD	< LOD	100	0.0459	0.7707	0.3763	0.0177	0.6609	0.0057	< LOD	0.0072	0.0045	0.0521	< LOD	0.001	0.0005	< LOD	< LOD	< LOD	< LOD	< LOD	< LOD	0.0005	< LOD	< LOD	< LOD	< LOD	< LOD
624GNC	< LOD	0.823	100	0.1147	0.0989	0.2429	0.0392	0.1627	0.0039	< LOD	0.0079	0.0051	0.0628	< LOD	0.001	0.0007	< LOD	< LOD	< LOD	< LOD	< LOD	< LOD	< LOD	0.0007	< LOD	< LOD	< LOD	< LOD
625GNC	< LOD	1.4715	100	0.0949	0.4364	0.2931	0.0649	0.3439	0.0094	< LOD	0.0083	< LOD	0.0741	< LOD	0.0012	0.0006	< LOD	< LOD	0.0005	< LOD	< LOD	< LOD	< LOD	< LOD	< LOD	< LOD	0.0006	< LOD
626GNC	< LOD	< LOD	100	0.1324	0.1509	0.2206	< LOD	0.2296	0.0029	< LOD	0.0074	0.0046	0.0677	< LOD	0.0011	0.0013	< LOD	< LOD	< LOD	< LOD	< LOD	< LOD	< LOD	< LOD	< LOD	< LOD	< LOD	< LOD
627GNC	< LOD	< LOD	100	0.1162	0.0332	0.2186	0.0066	0.1825	0.0022	< LOD	0.0061	0.0035	0.0696	< LOD	0.0009	0.0018	< LOD	< LOD	0.0005	< LOD	< LOD	< LOD	< LOD	< LOD	< LOD	< LOD	< LOD	< LOD
628GNC	< LOD	1.1376	98.9128	0.1063	0.0374	0.1311	0.0899	0.0807	0.0108	< LOD	0.0071	0.0025	0.0604	< LOD	0.0011	0.0007	< LOD	< LOD	< LOD	< LOD	0.0003	< LOD	0.0004	< LOD	< LOD	< LOD	< LOD	< LOD
629GNC	< LOD	0.5156	97.0627	0.0838	0.0553	0.1905	0.0703	0.1121	0.0129	0.0003	0.0062	0.0039	0.0685	< LOD	0.001	0.0008	< LOD	< LOD	< LOD	< LOD	0.0003	< LOD	0.0006	< LOD	< LOD	< LOD	< LOD	< LOD
633Espinheiro Norte	< LOD	0.7887	100	0.0796	0.0259	< LOD	0.021	0.0189	0.0033	< LOD	0.0051	0.0066	0.0669	< LOD	0.0011	0.0005	< LOD	< LOD	< LOD	< LOD	< LOD	< LOD	< LOD	0.0019	< LOD	0.0004	< LOD	< LOD
635Telhados Grandes	< LOD	0.2894	100	0.0699	0.0388	0.0408	0.0397	0.1135	0.0059	< LOD	0.0079	0.0037	0.1071	< LOD	0.001	0.0011	< LOD	< LOD	0.0008	< LOD	0.0003	< LOD	0.0004	< LOD	< LOD	< LOD	< LOD	< LOD
636Telhados Grandes	< LOD	0.5562	99.8001	0.0676	0.0324	0.0383	0.0514	0.1963	0.0084	< LOD	0.0084	0.0045	0.1356	< LOD	0.001	0.0011	< LOD	< LOD	0.0008	< LOD	0.0002	< LOD	0.0005	< LOD	< LOD	< LOD	< LOD	< LOD
639Casal da Brava 2	< LOD	0.486	100	0.0699	0.0207	< LOD	0.0427	0.0435	0.0056	< LOD	0.0064	0.0058	0.1188	< LOD	0.0008	0.001	< LOD	< LOD	0.0004	< LOD	0.0003	< LOD	< LOD	< LOD	< LOD	< LOD	< LOD	< LOD
640Casal da Brava 2	< LOD	1.4887	99.5217	0.0676	0.008	< LOD	0.0543	0.042	0.0092	< LOD	0.0064	0.0053	0.1306	< LOD	0.0009	0.0012	< LOD	< LOD	< LOD	< LOD	0.0002	< LOD	0.0004	< LOD	< LOD	< LOD	< LOD	< LOD
645Cabeça Veada	< LOD	0.1805	100	0.0726	0.0358	< LOD	0.0299	0.0918	0.0027	< LOD	0.0081	0.0049	0.0748	< LOD	0.001	0.0006	< LOD	< LOD	0.0015	< LOD	< LOD	< LOD	< LOD	< LOD	< LOD	< LOD	< LOD	< LOD
646Cabeça Veada	< LOD	< LOD	100	0.0705	0.0405	< LOD	0.0275	0.0772	0.0033	< LOD	0.0086	0.0035	0.1538	< LOD	0.0009	0.0006	< LOD	< LOD	0.0018	< LOD	0.0003	< LOD	< LOD	< LOD	< LOD	< LOD	0.0005	< LOD
654Curvachia	< LOD	0.2296	100	0.0717	0.0074	< LOD	0.0317	0.0188	0.004	< LOD	0.0069	0.0057	0.0777	< LOD	0.0012	< LOD	< LOD	< LOD	< LOD	< LOD	< LOD	< LOD	0.0004	< LOD	< LOD	< LOD	0.0007	< LOD
655Bajouco	< LOD	0.1937	100	0.0713	0.0088	< LOD	0.0243	0.0954	0.0043	< LOD	0.0067	0.0048	0.0787	< LOD	0.0009	0.0006	< LOD	< LOD	< LOD	0.0006	0.0002	< LOD	0.0004	< LOD	< LOD	< LOD	< LOD	< LOD
657Espinheiro sul	< LOD	1.9031	100	0.075	0.0294	0.0426	0.0358	0.0324	0.0059	< LOD	0.0053	0.0031	0.0881	0.0008	0.0013	0.0004	< LOD	< LOD	< LOD	< LOD	0.0023	< LOD	< LOD	0.0021	< LOD	< LOD	0.0006	< LOD
658Espinheiro sul	< LOD	1.2036	100	0.0706	0.0346	< LOD	0.0295	0.0257	0.0053	< LOD	0.0057	0.0033	0.0744	< LOD	0.0011	< LOD	< LOD	< LOD	< LOD	< LOD	0.0025	< LOD	0.0004	0.0016	< LOD	< LOD	0.0006	< LOD
663Nazare-Sitio-Topo	1.3456	< LOD	84.5517	0.0524	< LOD	< LOD	0.0173	0.091	0.008	0.0036	0.0046	< LOD	0.0595	< LOD	0.0009	< LOD	< LOD	< LOD	< LOD	< LOD	< LOD	< LOD	< LOD	< LOD	< LOD	< LOD	< LOD	< LOD
665Nazare-Sitio-Medio	< LOD	1.6595	100	0.0725	0.0982	0.1565	0.1433	0.2358	0.0082	< LOD	0.0078	0.0087	0.0774	< LOD	0.001	0.0003	< LOD	< LOD	< LOD	< LOD	< LOD	< LOD	0.0005	< LOD	< LOD	< LOD	< LOD	< LOD
669Nazare-Sitio-Base	< LOD	0.4526	100	0.0716	0.0469	< LOD	0.0318	0.4887	0.0061	< LOD	0.007	0.0033	0.0719	< LOD	0.0009	< LOD	< LOD	< LOD	0.0025	< LOD	0.0002	< LOD	0.0005	< LOD	< LOD	< LOD	< LOD	< LOD
671Nazare-Sitio-Superficie	1.1815	0.1664	85.2452	0.0602	< LOD	< LOD	0.0277	0.6511	0.0084	0.0027	0.0034	0.0035	0.0538	< LOD	0.001	< LOD	< LOD	< LOD	0.0007	< LOD	< LOD	< LOD	0.0007	< LOD	< LOD	< LOD	< LOD	< LOD
673Nazare-Sitio-Superficie	< LOD	0.381	100	0.0722	0.0427	0.0343	0.0494	0.0731	0.0054	< LOD	0.0081	0.0033	0.0702	< LOD	0.0008	< LOD	< LOD	< LOD	< LOD	< LOD	0.0002	< LOD	< LOD	< LOD	< LOD	< LOD	< LOD	< LOD
674Nazare-Sitio-Superficie	< LOD	0.3945	100	0.0637	0.0095	< LOD	0.0229	0.1168	0.0081	< LOD	0.0066	0.0058	0.0863	< LOD	0.0008	< LOD	< LOD	< LOD	< LOD	< LOD	< LOD	< LOD	0.0005	< LOD	< LOD	< LOD	< LOD	< LOD
678Nazare-Calhau	< LOD	< LOD	90.3905	0.0536	0.0194	0.0355	0.0266	0.0192	< LOD	< LOD	0.0064	< LOD	0.0563	< LOD	0.0011	0.0004	< LOD	< LOD	< LOD	< LOD	< LOD	< LOD	< LOD	< LOD	< LOD	< LOD	0.0006	< LOD
679Nazare-Calhau	< LOD	< LOD	97.176	0.0649	< LOD	0.0243	0.0145	0.0124	0.0039	0.0003	0.0077	< LOD	0.0538	< LOD	0.0009	< LOD	< LOD	< LOD	< LOD	< LOD	< LOD	< LOD	< LOD	< LOD	< LOD	< LOD	< LOD	< LOD
684Nazare-Calhau	< LOD	0.4484	100	0.0703	0.0409	0.0177	0.0465	0.0273	0.0037	< LOD	0.0061	0.0042	0.0595	< LOD	0.001	< LOD	< LOD	< LOD	< LOD	< LOD	< LOD	< LOD	0.0005	< LOD	< LOD	< LOD	< LOD	< LOD
686Nazare-Calhau	< LOD	< LOD	100	0.0665	0.0083	< LOD	0.0063	0.2814	< LOD	< LOD	0.0092	0.0042	0.0678	< LOD	0.0008	0.0004	< LOD	< LOD	0.0006	< LOD	< LOD	< LOD	0.0005	< LOD	< LOD	< LOD	0.0005	< LOD
687AreeiroAerodromoEste	< LOD	0.2241	97.0368	0.0545	< LOD	0.0186	0.0275	0.0116	0.0046	0.0003	0.0066	0.0025	0.0762	< LOD	0.0008	0.0005	< LOD	< LOD	0.0005	< LOD	< LOD	< LOD	< LOD	< LOD	0.0255	< LOD	< LOD	< LOD
692Lagoa Pequena	< LOD	< LOD	100	0.0695	0.0313	< LOD	0.0143	< LOD	< LOD	< LOD	0.0078	0.0034	0.053	< LOD	0.0011	< LOD	< LOD	< LOD	< LOD	< LOD	< LOD	< LOD	< LOD	< LOD	< LOD	< LOD	< LOD	< LOD
697Espinheiro sul	< LOD	0.7252	100	0.0691	0.0248	< LOD	0.0291	0.0066	0.0038	< LOD	0.0078	0.004	0.0592	< LOD	0.0009	< LOD	< LOD	< LOD	< LOD	< LOD	< LOD	< LOD	0.0004	< LOD	< LOD	< LOD	< LOD	< LOD
700Arneiro Milhariça	< LOD	1.6039	98.0599	0.0126	0.2041	< LOD	0.018	0.0113	0.2954	0.0002	0.0047	< LOD	1.0881	0.0013	0.002	0.0022	0.0004	< LOD	0.0015	0.0036	0.0476	0.0003	< LOD	< LOD	0.065	< LOD	0.0007	0.001
717Prado Este	< LOD	1.1541	100	0.0702	0.0367	0.0448	0.0514	0.0178	0.0031	< LOD	0.0055	0.0039	0.068	< LOD	0.0009	0.0003	< LOD	< LOD	< LOD	< LOD	< LOD	< LOD	< LOD	0.0009	< LOD	< LOD	0.0006	< LOD
718Prado Este	< LOD	0.7426	97.7638	0.0541	< LOD	0.0246	0.0357	0.0203	0.0058	0.0004	0.0069	0.0047	0.0652	< LOD	0.0013	0.0003	< LOD	< LOD	< LOD	< LOD	< LOD	< LOD	0.0005	< LOD	< LOD	< LOD	< LOD	< LOD
719Moinho da Freira	< LOD	< LOD	100	0.0771	0.0356	< LOD	0.0311	0.0891	0.0039	< LOD	0.0083	0.0042	0.0929	< LOD	0.0009	0.001	< LOD	< LOD	< LOD	< LOD	< LOD	< LOD	0.0005	0.001	< LOD	< LOD	0.0005	< LOD
720Moinho da Freira	< LOD	0.2432	100	0.0684	0.0386	0.03	0.0298	0.0802	0.0028	< LOD	0.0077	0.0039	0.084	< LOD	0.001	0.0008	< LOD	< LOD	0.0005	< LOD	< LOD	< LOD	0.0006	< LOD	< LOD	< LOD	0.0007	< LOD
723Espinheiro sul	< LOD	0.5371	100	0.0664	0.0082	< LOD	0.0425	0.0077	0.0045	< LOD	0.0079	0.0039	0.0875	< LOD	0.0009	0.0004	< LOD	< LOD	0.0005	< LOD	0.0004	< LOD	0.0005	< LOD	< LOD	< LOD	0.0005	< LOD
724Espinheiro sul	< LOD	0.6509	100	0.0763	0.0294	0.0368	0.0605	0.0171	< LOD	< LOD	0.0087	0.0031	0.0936	< LOD	0.001	0.0004	< LOD	< LOD	0.0004	< LOD	0.0002	< LOD	0.0005	< LOD	< LOD	< LOD	< LOD	< LOD
727Torres Novas	< LOD	< LOD	90.6619	0.0775	< LOD	< LOD	0.0135	0.0913	0.0074	0.0017	0.0068	0.0027	0.0736	< LOD	0.0009	0.0004	< LOD	< LOD	< LOD	< LOD	< LOD	< LOD	< LOD	< LOD	< LOD	< LOD	< LOD	< LOD
729Opeia-Leiria	< LOD	< LOD	100	0.066	0.0343	0.0231	0.0361	0.013	0.0026	< LOD	0.008	0.0027	0.0651	< LOD	0.0009	< LOD	< LOD	< LOD	< LOD	< LOD	< LOD	< LOD	< LOD	< LOD	< LOD	< LOD	0.0005	< LOD
734Marinha Grande (Tojeira)	< LOD	< LOD	99.7592	0.0782	< LOD	< LOD	0.0257	0.037	0.009	< LOD	0.008	0.0031	0.4113	< LOD	0.0011	0.0006	< LOD	< LOD	< LOD	< LOD	0.0002	< LOD	0.0005	< LOD	< LOD	< LOD	< LOD	< LOD
741Povo da Martinela (Leiria)	< LOD	0.4248	100	0.0719	0.0169	< LOD	0.0615	0.0402	0.0067	< LOD	0.0085	< LOD	0.0842	< LOD	0.0007	0.0003	< LOD	< LOD	0.0004	< LOD	< LOD	< LOD	< LOD	< LOD	< LOD	< LOD	< LOD	< LOD
745Arroteia 1 (Leiria)	1.2235	0.4129	87.659	0.0539	< LOD	< LOD	0.0528	0.0204	0.0121	0.0022	0.0041	0.0034	0.0807	< LOD	0.001	< LOD	< LOD	< LOD	< LOD	< LOD	< LOD	< LOD	0.0007	< LOD	< LOD	< LOD	0.0007	< LOD
752Alcanena (Monsanto2)	< LOD	0.7901	100	0.0661	0.0858	0.0286	0.0626	0.0667	0.0496	< LOD	0.0057	0.0029	0.1486	< LOD	0.001	0.0006	< LOD	< LOD	0.0011	< LOD	0.0004	< LOD	< LOD	< LOD	0.0181	< LOD	< LOD	< LOD
754Alcanena (Monsanto2)	< LOD	2.1129	100	0.0653	0.0165	< LOD	0.0602	0.0411	0.0073	< LOD	0.0074	0.0029	0.0792	< LOD	0.0011	< LOD	< LOD	< LOD	< LOD	< LOD	< LOD	< LOD	< LOD	< LOD	< LOD	< LOD	< LOD	< LOD
765Vale Comprido (Rio Maior)	< LOD	1.0381	98.5521	0.0767	0.0534	0.0491	0.0548	0.1406	0.0072	< LOD	0.0056	0.0038	0.0681	< LOD	0.0012	< LOD	< LOD	< LOD	< LOD	< LOD	< LOD	< LOD	< LOD	0.0019	< LOD	< LOD	< LOD	< LOD
769Passal	< LOD	2.0452	100	0.0714	0.0131	< LOD	0.0741	0.0086	0.0098	< LOD	0.0065	0.0048	0.0933	< LOD	0.0009	< LOD	< LOD	< LOD	< LOD	< LOD	0.0007	< LOD	0.0004	< LOD	< LOD	< LOD	0.0006	< LOD
773Passal	< LOD	0.5665	100	0.069	0.0211	< LOD	0.0266	0.0097	0.0033	< LOD	0.0062	0.0033	0.0817	< LOD	0.0011	0.0005	< LOD	< LOD	< LOD	< LOD	< LOD	< LOD	< LOD	< LOD	< LOD	< LOD	< LOD	< LOD
775Bancada Silex Chitas	< LOD	< LOD	100	0.0677	0.0133	< LOD	0.017	0.0184	0.0018	< LOD	0.0061	0.0028	0.0661	< LOD	0.001	< LOD	< LOD	< LOD	< LOD	< LOD	< LOD	< LOD	0.0005	< LOD	< LOD	< LOD	< LOD	< LOD
777Atouguia	< LOD	0.2453	100	0.0747	0.0425	< LOD	0.0147	0.3544	0.0027	< LOD	0.0083	0.004	0.0545	< LOD	0.001	0.0003	< LOD	< LOD	0.0004	< LOD	< LOD	< LOD	0.0005	0.0008	< LOD	< LOD	0.0005	< LOD
781Vale Comprido (Rio Maior)	1.2315	0.4507	80.1497	0.0513	< LOD	< LOD	0.064	0.0346	0.0374	0.0021	0.0032	0.0227	1.0513	< LOD	0.0011	0.0004	< LOD	< LOD	0.001	0.0008	0.0006	< LOD	< LOD	< LOD	0.0447	< LOD	< LOD	< LOD
782Nazaré-Calhau(Rotunda)	< LOD	0.3077	100	0.0677	0.0274	< LOD	0.0314	0.0771	0.002	< LOD	0.0079	0.0025	0.0619	< LOD	0.0012	< LOD	< LOD	< LOD	< LOD	< LOD	< LOD	< LOD	0.0006	< LOD	< LOD	< LOD	< LOD	< LOD
788Atouguia	< LOD	< LOD	100	0.0688	0.0352	< LOD	0.0195	0.0435	0.0018	< LOD	0.006	0.0093	0.0513	< LOD	0.001	< LOD	< LOD	< LOD	< LOD	< LOD	< LOD	< LOD	< LOD	< LOD	< LOD	< LOD	< LOD	< LOD
789Atouguia	< LOD	0.6323	100	0.0693	0.0316	< LOD	0.0306	0.0411	0.0023	< LOD	0.0062	0.0096	0.055	< LOD	0.0008	< LOD	< LOD	< LOD	< LOD	< LOD	0.0002	< LOD	< LOD	< LOD	< LOD	< LOD	< LOD	< LOD
791Atouguia	< LOD	1.0818	100	0.0795	0.021	0.0227	0.0319	0.0654	0.009	< LOD	0.0023	0.0041	0.0965	< LOD	0.0012	0.0004	< LOD	< LOD	0.0007	< LOD	0.0003	< LOD	0.0006	0.0026	0.0699	< LOD	0.0007	0.0013
799Vale Comprido (Rio Maior)	1.118	0.1851	81.2731	0.054	< LOD	< LOD	0.0141	0.028	0.008	0.0043	0.0038	0.0021	0.059	< LOD	0.0011	< LOD	< LOD	< LOD	< LOD	< LOD	< LOD	< LOD	< LOD	< LOD	< LOD	0.0007	< LOD	< LOD
807Picassinos (MarinhaGrande)	< LOD	0.2315	100	0.0684	0.0132	< LOD	0.0226	0.0501	0.0025	< LOD	0.0085	0.0032	0.0744	< LOD	0.001	0.0004	< LOD	< LOD	< LOD	< LOD	< LOD	< LOD	< LOD	< LOD	< LOD	< LOD	< LOD	< LOD
870Runa	< LOD	0.1756	100	0.0661	< LOD	< LOD	0.027	0.0954	0.0058	< LOD	0.0056	0.0071	0.2626	< LOD	0.0011	< LOD	< LOD	< LOD	< LOD	< LOD	< LOD	< LOD	< LOD	< LOD	< LOD	< LOD	< LOD	< LOD
874Gato Preto (Rio Maior)	< LOD	0.3974	100	0.0697	< LOD	< LOD	0.0258	0.0037	0.0068	< LOD	0.0052	0.0033	0.1214	< LOD	0.0008	< LOD	< LOD	< LOD	< LOD	< LOD	0.0003	< LOD	< LOD	< LOD	0.0422	< LOD	< LOD	< LOD
875Gato Preto (Rio Maior)	< LOD	< LOD	100	0.0671	< LOD	< LOD	0.0253	0.0039	0.0024	< LOD	0.0056	0.0098	0.3721	< LOD	0.001	0.0005	0.0005	< LOD	< LOD	< LOD	< LOD	< LOD	< LOD	< LOD	0.022	< LOD	< LOD	< LOD
880Roliça	< LOD	0.7014	100	0.0767	0.0122	0.0456	0.0841	0.0971	0.0078	< LOD	0.0025	0.005	0.0636	< LOD	0.0011	< LOD	< LOD	< LOD	< LOD	< LOD	< LOD	< LOD	< LOD	< LOD	< LOD	< LOD	< LOD	< LOD
902Azinheira	< LOD	1.1804	100	0.073	0.0323	0.0544	0.0496	0.0478	0.0053	< LOD	0.0066	0.0032	0.0686	< LOD	0.001	0.0003	< LOD	< LOD	< LOD	< LOD	0.0002	< LOD	< LOD	0.0008	< LOD	< LOD	< LOD	< LOD
903Azinheira	< LOD	< LOD	100	0.0687	< LOD	< LOD	0.0103	< LOD	0.0016	< LOD	0.0069	0.0037	0.049	< LOD	0.0011	< LOD	< LOD	< LOD	< LOD	< LOD	< LOD	< LOD	< LOD	< LOD	< LOD	< LOD	< LOD	< LOD
905Azinheira	< LOD	0.6387	100	0.0718	< LOD	< LOD	0.0539	0.0198	0.0069	< LOD	0.0082	0.0035	0.0829	< LOD	0.0008	< LOD	< LOD	< LOD	0.0005	< LOD	0.0002	< LOD	0.0005	< LOD	< LOD	< LOD	0.0008	< LOD
906Azinheira	< LOD	0.4415	99.1105	0.0543	< LOD	< LOD	0.0331	< LOD	0.0054	0.0001	0.0055	0.0026	0.1104	< LOD	0.0009	0.0004	< LOD	< LOD	< LOD	< LOD	0.0003	< LOD	< LOD	< LOD	< LOD	< LOD	< LOD	< LOD
907Azinheira	< LOD	0.8336	100	0.066	0.0123	< LOD	0.0378	0.0049	0.0056	< LOD	0.0068	0.0036	0.0804	< LOD	0.0011	< LOD	< LOD	< LOD	< LOD	< LOD	0.0004	< LOD	< LOD	< LOD	< LOD	< LOD	0.0006	< LOD
908Azinheira	< LOD	0.2275	100	0.0745	0.0159	< LOD	0.0283	0.0062	0.0038	< LOD	0.008	0.0033	0.0753	< LOD	0.0011	< LOD	< LOD	< LOD	< LOD	< LOD	0.0003	< LOD	0.0005	< LOD	< LOD	< LOD	< LOD	< LOD
909Azinheira	< LOD	0.3925	100	0.0675	< LOD	< LOD	0.0394	0.0141	0.005	< LOD	0.0071	0.0035	0.0657	< LOD	0.0009	< LOD	< LOD	< LOD	< LOD	< LOD	0.0002	< LOD	< LOD	< LOD	< LOD	< LOD	< LOD	< LOD
910Azinheira	< LOD	< LOD	99.6151	0.0646	< LOD	< LOD	0.0195	0.0042	0.0029	< LOD	0.006	0.0043	0.1212	< LOD	0.001	0.0004	< LOD	< LOD	< LOD	< LOD	0.0025	< LOD	0.0004	< LOD	< LOD	< LOD	< LOD	< LOD
912Azinheira	< LOD	0.627	100	0.0729	0.0169	< LOD	0.0278	0.0097	0.0062	< LOD	0.0056	0.0038	0.0717	< LOD	0.0009	< LOD	< LOD	< LOD	< LOD	< LOD	0.0002	< LOD	< LOD	< LOD	< LOD	< LOD	0.0005	< LOD
913Azinheira	< LOD	0.4364	100	0.0697	< LOD	< LOD	0.023	0.0059	0.0031	< LOD	0.0072	0.004	0.0621	< LOD	0.001	0.0003	< LOD	< LOD	< LOD	< LOD	< LOD	< LOD	< LOD	< LOD	< LOD	< LOD	< LOD	< LOD
926Vale do Barco	< LOD	0.5286	100	0.067	< LOD	< LOD	0.0374	0.0127	0.0042	< LOD	0.0065	0.0041	0.0906	< LOD	0.0009	0.0005	< LOD	< LOD	< LOD	< LOD	0.0003	< LOD	0.0004	< LOD	< LOD	< LOD	0.0005	< LOD
927Vale do Barco	< LOD	0.7969	100	0.0769	0.0277	< LOD	0.0415	0.0265	0.0052	< LOD	0.0077	0.0036	0.1286	< LOD	0.0012	< LOD	< LOD	< LOD	< LOD	< LOD	0.0006	< LOD	< LOD	< LOD	< LOD	< LOD	< LOD	< LOD

## Sheet: Table 2. PIXE
Table 1. PIXE: All data collected
Artefact	Si O2	P2 O5	S	Cl	K2 O	CaO	Ti O2	V2O5	Cr2 O3	MnO	Fe2O3	Co O	Ni O	Cu O	Zn O	As2 O3	Br O2	Sr O	Ba O	PbO
PRC 142 branca~zona1	99.4956	832.569	757.076	559.627	1018.28	1721.21	400.506		14.5816		388.047								184.81
PRC 142 branca~zona2	99.7618	664.22	394.524	215.778	585.6	637.198	100.156		10.0989		341.272								97.6285
PRC 142 branca~zona3	99.6579	902.752	456.349	348.066	931.591	885.476	213.19		18.89		447.039								120.752
PRC 142 branca- MEDIA	99.6384	799.847	535.983	374.49	845.156	1081.29	237.951		14.5235		392.12								134.397
PRC-217 zona castanha-1	97.9053	753.67	627.082	7511.3	904.638	11341.3	78.0456			7.9832	281.344						64.2385	71.2832	59.551
PRC-217 zona branca-1	94.3124	919.954	2322.8	18195.3	1375.06	34079.8	183.392			15.0918	443.928				11.4408		159.069	48.7859	40.8721
PRC-217 zona branca-2	95.18		2475.01	15668.4	1196.14	28039	131.064			12.5	318.927				7.25085		133.933	73.2102	144.395
PRC-217 zona branca MEDIA	94.7462	919.954	2398.91	16931.8	1285.6	31059.4	157.228			13.7959	381.427				9.34584		146.501	60.998	92.6334
PRC-408 negro-1	99.6546	500.688	492.978	391.144	771.379	357.278	158.262			145.736	781.344			47.3311					308.612
PRC-408 negro-2	99.5928	438.761	703.761	543.626	813.203	401.567	145.009			102.756	801.064			137.845			29.7747	36.7518	356.737
PRC-408 negro	99.6237	469.725	598.369	467.385	792.291	379.422	151.636			124.246	791.204			92.5881			29.7747	36.7518	332.675
PRC-115 branco	85.957	1562.39	979.658	134984	1791.75	2250.64					424.098
Mira Nascente-91 -1	99.2736	583.257	1963.17	248.585	834.61	3141.25	330.253			13.6099	732.618
Mira Nascente-142-1(castanho caramelo menos brilhante	98.8999	869.495	5278.2	2386.17	1207.18	1124.26	126.953		15.9786	63.2132	732.302								66.4785
Mira Nascente-142-1(castanho caramelo mais brilhante)	96.5158		27943.1	2667.34	1777.01	1284.9	131.463		17.4578	79.2306	855.508								86.3443
Mira Nascente-443 castanho claro	99.1506	634.174	1231.14	1531.09	2722.03	1615.01	149.307		15.0862	12.5614	1125								92.6637
Mira Nascente-84 castanho + claro	99.4084	443.349	1543.88	714.486	1343.61	1578.03	149.347		17.8446	6.98254	471.39								90.8391
Mira Nascente-84 branco/bege	98.8579	741.284	2323.78	1695.26	3559.53	2395.55	291.672		13.4772	12.8476	1016.27			5.93011	9.80367				96.796
Mira Nascente-11 ?	99.4118	615.596	1099.05	322.845	662.553	1296.4	121.38		16.4295	18.7798	2285.17			9.08423					50.4834
Mira Nascente-6-1 castanho mais escuro	99.269	450.688	1104.45	1675.01	1870.06	1676.93	188.256		14.7473	10.9534	760.039				9.17204
Mira Nascente-171 branca	99.3593	523.394	847.615	2770.16	1596.85	809.967	72.2386		7.90568	7.72936	284.36			10.1541
GN 279	95.9248	13947.2	5751	4141	1099.16	6939.86	197.667	24.9866			1025.43			9.47309					63.6161
GN 127	98.3473	4717.89	1690	2491	2277.11	2040.56	422.167	18.8958			1334.86	8.43		38.2979	17.5467				62.7344
GN 58(1)	99.4887	2118.35	72.63	1534	524.819	997.762	117.983				687.571				8.27024				56.7411
GN 32(1) zona clara	95.4655	29575.7	273.1	5078	557.349	9222.38	90.0333			205.039	920			13.8423					54.4754
GN 32(1) zona escura	97.0636	19146.8	407.5	2681	1178.43	4381.82	221.167		24.4006	108.708	1635.71			15.0563	19.2154				69.933
GN 109	99.3171	2422.02	543.5	1653	665.301	862.238	111.8				840.143		5.641	8.90864	28.2939
GN 4(1)	98.6741	3577.98	462.2	4189	163.253	4359.44	25.9167			7.44315	887.857			4.76345	19.4396
GN 17(43)	61.4283	293305	2660	2307		83714.7	80.15				554.286			16.771	40.0498
GN 255(22)	97.1006	8119.27	870.4	11468	353.133	7413.99	87.1333			23.2429	504			7.93242	34.9689
GN 74(43) interior (lado das letras)	98.2116	3738.53	1095	4927	730.602	5567.83	208.333				1161.29				19.1532
GN 74(43) exterior	97.2647	7167.43	498.9	9650	1404.82	4030.77	534.5				4385.71			27.1589	34.3711				304.688
GN 182(3)	99.1021	3311.93	1104	1718	454.458	976.643	95.1333				824.143				15.1557				53.2143
GN 120	91.7837	45215.6		19441	903.133	12190.2	592	39.1451		26.7183	5008.57			23.4543	21.731				115.625
GN 1(43)	93.6458	34431.2	261	7526	1111.57	13074.1	232	51.1131		71.6537	8038.57			23.2416	29.1034				168.527
GN 83	99.1201	5511.47		1863	474.217	888.112	76.3167				527.857			23.7672	38.8169
GN 600(1)	98.7715	2697.25	295.1	647.4	178.193	455.944					347.857				14.6077				93.6719
GN 78(1)	99.2236	3598.62		3079	266.265	1622.38	46.0833				252.143			7.99374	18.7796
GN 77	98.8859	3344.04	811.6	3656	817.47	1627.97	136.017				646.571			24.5181
GN 126	98.4006	8669.72	291.9	3376	1043.37	2388.81	349				599				15.4545
GN 66(1)	98.8863			4645	459.277	2802.8	138.733				1046.86				15.1806
GN 21	93.93	21084.9		13410	684.699	7492.31	213.667	49.7418	32.2953		18818.6			20.1627	36.9988				758.259
GN 66-1	98.9625	3332.57	254	3836	455.181	2412.59	89.0833				787.429		4.96438		14.1719			37.4823
GN 110	94.5111	32158.3	527.2	9954	667.108	9227.97	325.833	21.6563	89.2982	10.3979	2211.43			13.8423	34.8941			31.8676	99.442
GN 62-8-5	98.4242	4816.51	222.5	5964	432.289	4197.2	76.8333				837.143			6.15895	35.4421				63.9062
GeoRio Maior I-a (zona amarelada)	98.1829	2095.18	315.5		1616.87	2586.01	1290.67	33.1077	22.6608	37.0672	11864.3			19.1615	9.20174
GeoRio Maior I-a (zona mais branca)	99.8854	1540.6			224.699	419.021	9.62667				171.286
GeoRio Maior I-a (zona mista com branco e amarelo)	99.7032	2621.56			397.952	520	22.9833				467.571
Vidigal - Leiria (zona castanha)	99.7009	1892.66			478.434	443.776	111.267			4.85401	1244.57				2.88792
Vidigal - Leiria (zona branca)	99.5079	2017.2			673.012	632.587	197.333			12.9716	2127.14				4.14446
GN 62-8-5-B	99.2777	3169.72	308.6	383.2	1012.53	453.287	139.467		7.31433		1222.86			19.3867	10.7086		14.1036		27.0201
Montes I (geo)	99.6925				371.084	592.028	57.6			32.261	336.714	6.6285		0
Praia da Nazaré (geo)	99.4597		185.1	317.9	800.964	2159.44	236.5			101.512	734.571		4.47583	0	7.81943				28.2254
Sezaredos ponto 2 (geo)	99.0683		337.5	545.9	3236.14	1535.66	464.5		9.3962	50.2972	3420			5.76971	10.0311
Gruta da Nazaré	99.8096	1575.69			285.904	752.308	45.55				178.286
AAE (areeiro do aerodromo este)	99.733	1750.23			707.47	333.846	91.0667	8.50757			982.571				2.79826				34.1406
GN 103	98.7188	6727.06	731.3	2178	939.639	1359.3	116.183				861.286				10.9651				27.8683
Sezaredos ponto 1 (geo)	99.2737	1875.46	95.07		249.88	591.329	35.0667			26.77	5878.57				21.6314
GN 62-8-5-C	99.5814	2479.36	190.1	999.1	510.241	272.448	79.2667		21.6959		623.571			4.70713	10.7335
Martinela (Leiria)	99.652	1725.23			195.663	477.063	27.6333				196.429	0			8.64757
Table 2. PIXE: Data without the SiO2 values and the concentration of the remaining elements/oxides normalized to 100%.
Artefact	P2 O5	S	Cl	K2 O	CaO	Ti O2	V2O5	Cr2 O3	MnO	Fe2O3	Co O	Ni O	Cu O	Zn O	As2 O3	Br O2	Sr O	Ba O	PbO
Montes I (geo)	0	0	0	26.576	42.3993	4.12514	0	0	2.31044	24.1145	0.474713	0	0	0	0	0	0	0	0
Praia da Nazaré (geo)	0	4.04457	6.94634	17.5016	47.1853	5.1677	0	0	2.2181	16.0509	0	0.0978	0	0.17086	0	0	0	0.616746	0
Gruta da Nazaré	55.5263	0	0	10.0751	26.5108	1.60515	0	0	0	6.28268	0	0	0	0	0	0	0	0	0
PRC-408 negro-2	9.72679	15.6015	12.0515	18.0277	8.90223	3.21467	0	0	2.27797	17.7586	0	0	3.05585	0	0	0.660067	0.814741	7.90841	0
PRC-217 zona castanha-1	3.47306	2.88971	34.6135	4.16874	52.2631	0.359649	0	0	0.0367881	1.29649	0	0	0	0	0	0.296024	0.328487	0.274423	0
PRC-217 zona branca-2	0	5.1349	32.5072	2.48163	58.1724	0.271919	0	0	0.0259336	0.661676	0	0	0	0.0150433	0	0.27787	0.151889	0.299575	0
PRC-217 zona branca-1	1.59174	4.019	31.4822	2.37918	58.9662	0.317312	0	0	0.0261123	0.7681	0	0	0	0.0197953	0	0.275227	0.0844111	0.0707184	0
PRC-408 negro-1	12.6604	12.4654	9.89049	19.5051	9.03414	4.00183	0	0	3.6851	19.7571	0	0	1.19682	0	0	0	0	7.80358	0
PRC 142 branca~zona2	21.8029	12.9502	7.08286	19.2222	20.9159	3.28761	0	0.331495	0	11.2022	0	0	0	0	0	0	0	3.20464	0
PRC 142 branca~zona1	14.1673	12.8827	9.52281	17.3274	29.2887	6.81515	0	0.248126	0	6.60315	0	0	0	0	0	0	0	3.14479	0
PRC 142 branca~zona3	20.8772	10.5536	8.04943	21.5441	20.4777	4.93027	0	0.436853	0	10.3383	0	0	0	0	0	0	0	2.79252	0
MN-84 castanho	0	26.1201	12.3189	22.6613	26.5163	2.49216	0	0.305028	0.134962	7.98799	0	0	0	0	0	0	0	1.46319	0
MN-84 castanho claro	6.97115	24.2758	11.2345	21.1267	24.8127	2.34832	0	0.280587	0.109793	7.41208	0	0	0	0	0	0	0	1.42834	0
MN-443 castanho claro	6.94752	13.4875	16.7734	29.8204	17.6928	1.6357	0	0.165272	0.137613	12.3246	0	0	0	0	0	0	0	1.01515	0
MN-84 branco/bege	6.09499	19.1066	13.9387	29.2672	19.6966	2.39819	0	0.110812	0.105635	8.35599	0	0	0.0487585	0.0806077	0	0	0	0.795876	0
MN-11 ?	9.47396	16.9142	4.96855	10.1966	19.9515	1.86802	0	0.252849	0.289019	35.1685	0	0	0.139805	0	0	0	0	0.776933	0
MN-91 -2	0	14.289	11.3577	22.3221	10.3304	4.57496	0	0	4.21999	22.6182	0	0	1.37232	0	0	0	0	8.91533	0
MN-142-1(cast caram - brilh)	7.32501	44.4658	20.1021	10.1698	9.47127	1.06951	0	0.134611	0.532535	6.16923	0	0	0	0	0	0	0	0.560044	0
MN-142-1(cast caram + brilh)	0	80.1986	7.65546	5.10015	3.68776	0.377307	0	0.0501052	0.227398	2.45537	0	0	0	0	0	0	0	0.247815	0
MN-72 heterog pintas red	0	14.7878	27.9938	32.699	13.5417	1.40806	0	0.184386	0.133383	9.25177	0	0	0	0	0	0	0	0	0
MN-6-1 castanho mais escuro	5.8076	14.232	21.5843	24.0977	21.6091	2.42589	0	0.190035	0.141147	9.79393	0	0	0	0.118192	0	0	0	0	0
MN-171 branca	7.55218	12.2304	39.9713	23.0414	11.6872	1.04235	0	0.114073	0.111529	4.10309	0	0	0.146516	0	0	0	0	0	0
MN-91 -1	7.43253	25.017	3.16776	10.6356	40.0294	4.20847	0	0	0.173434	9.33586	0	0	0	0	0	0	0	0	0
Rio Maior(b+a)	65.05	0	0	9.87457	12.903	0.570297	0	0	0	11.6021	0	0	0	0	0	0	0	0	0
Rio Maior(branco)	65.1352	0	0	9.50009	17.7159	0.407008	0	0	0	7.24183	0	0	0	0	0	0	0	0	0
Rio Maior(amarelo)	10.534	1.58625	0	8.12916	13.0018	6.48912	0.166457	0.113932	0.186364	59.6504	0	0	0.0963385	0.0462638	0	0	0	0	0
AAE (Leiria)	44.7557	0	0	18.0909	8.53689	2.3287	0.21755	0	0	25.1257	0	0	0	0.0715551	0	0	0	0.873021	0
Martinela (Leiria)	65.5815	0	0	7.43777	18.1347	1.05043	0	0	0	7.46688	0	0	0	0.328722	0	0	0	0	0
Vidigal - Leiria (castanho)	45.2958	0	0	11.45	10.6206	2.66287	0	0	0.116168	29.7855	0	0	0	0.0691146	0	0	0	0	0
Vidigal - Leiria (branco)	35.612	0	0	11.8814	11.1678	3.48375	0	0	0.229002	37.5529	0	0	0	0.0731668	0	0	0	0	0
Cesaredas 2	0	3.51007	5.67747	33.6565	15.9712	4.83089	0	0.0977223	0.5231	35.5687	0	0	0.0600061	0.104326	0	0	0	0	0
Cesaredas 1	21.3757	1.08357	0	2.84803	6.73973	0.399676	0	0	0.305114	67.0016	0	0	0	0.246546	0	0	0	0	0
PRC-115 branco	1.10033	0.689936	95.0642	1.26186	1.58504	0	0	0	0	0.298676	0	0	0	0	0	0	0	0	0
GNC 255(22)	28.1118	3.01364	39.7063	1.22267	25.6699	0.301687	0	0	0.0804752	1.74503	0	0	0.0274649	0.121075	0	0	0	0	0
GNC 4(1)	26.1218	3.37439	30.5827	1.19186	31.827	0.18921	0	0	0.0543403	6.48199	0	0	0.0347766	0.141923	0	0	0	0	0
GNC 17(43)	76.6454	0.695101	0.602857	0	21.876	0.0209445	0	0	0	0.144844	0	0	0.00438253	0.0104657	0	0	0	0	0
GNC 127	31.204	11.1776	16.4754	15.0608	13.4962	2.7922	0.124977	0	0	8.82872	0.0557559	0	0.253301	0.116054	0	0	0	0.414924	0
GNC 109	33.9178	7.61115	23.1485	9.31684	12.0747	1.56564	0	0	0	11.7653	0	0.0789963	0.124756	0.396226	0	0	0	0	0
GNC 66-1	29.6929	2.26312	34.1784	4.05562	21.4959	0.793724	0	0	0	7.01591	0	0.0442321	0	0.12627	0	0	0.333963	0	0
GNC 110	58.0755	0.952085	17.9762	1.20475	16.6651	0.588431	0.0391097	0.161266	0.0187779	3.99368	0	0	0.0249982	0.0630163	0	0	0.0575506	0.179585	0
GNC 62-8-5-B	46.8326	4.55956	5.66177	14.9601	6.6973	2.06062	0	0.108069	0	18.0677	0	0	0.286439	0.158219	0	0.208381	0	0.399221	0
GNC 62-8-5-C	47.7606	3.66195	19.246	9.82892	5.24824	1.52694	0	0.417935	0	12.012	0	0	0.0906749	0.206763	0	0	0	0	0
GNC 77	30.224	7.33538	33.0436	7.38843	14.7139	1.22934	0	0	0	5.84382	0	0	0.221599	0	0	0	0	0	0
GNC 126	51.8113	1.74443	20.1754	6.23533	14.2758	2.08567	0	0	0	3.5797	0	0	0	0.0923582	0	0	0	0	0
GNC 83	58.6105	0	19.8117	5.04295	9.44443	0.811573	0	0	0	5.61338	0	0	0.252747	0.41279	0	0	0	0	0
GNC 66(1)	0	0	51	5.04265	30.7734	1.52323	0	0	0	11.494	0	0	0	0.166676	0	0	0	0	0
GNC 74(43)ventral	21.427	6.27588	28.2386	4.18738	31.9115	1.19404	0	0	0	6.65579	0	0	0	0.109775	0	0	0	0	0
GNC 78(1)	40.4737	0	34.6295	2.99468	18.2469	0.518299	0	0	0	2.83585	0	0	0.0899056	0.211214	0	0	0	0	0
GNC 32(1) escura	64.0581	1.36334	8.96963	3.9426	14.6599	0.739942	0	0.0816353	0.363697	5.4725	0	0	0.0503729	0.0642878	0	0	0	0.23397	0
GNC 103	51.94	5.6464	16.8164	7.255	10.4952	0.897057	0	0	0	6.65003	0	0	0	0.0846623	0	0	0	0.215173	0
GNC 279	42.0105	17.3226	12.4731	3.31077	20.9035	0.595392	0.0752623	0	0	3.08869	0	0	0.0285339	0	0	0	0	0.191618	0
GNC120	54.1004	0	23.2611	1.0806	14.5856	0.708327	0.0468371	0	0.0319685	5.99275	0	0	0.0280631	0.0260011	0	0	0	0.138345	0
GNC32(1) clara	64.3091	0.593826	11.0416	1.2119	20.053	0.195768	0	0	0.445834	2.00044	0	0	0.0300986	0	0	0	0	0.118451	0
GNC62-8-5	28.9246	1.33618	35.8155	2.59602	25.2054	0.461406	0	0	0	5.02728	0	0	0.0369863	0.21284	0	0	0	0.383775	0
GNC1(43)	52.9563	0.401427	11.5752	1.70963	20.1084	0.356824	0.0786136	0	0.110206	12.3636	0	0	0.0357463	0.0447619	0	0	0	0.2592	0
GNC182(3)	38.7239	12.9082	20.0873	5.31363	11.4192	1.11232	0	0	0	9.63608	0	0	0	0.177204	0	0	0	0.622195	0
GNC58(1)	34.6241	1.18713	25.073	8.5781	16.3083	1.92842	0	0	0	11.2383	0	0	0	0.135176	0	0	0	0.927426	0
GNC600(1)	57.024	6.23887	13.687	3.76727	9.63937	0	0	0	0	7.35424	0	0	0	0.30883	0	0	0	1.98037	0
GNC21	33.681	0	21.4212	1.09374	11.9682	0.341312	0.0794577	0.0515887	0	30.0609	0	0	0.032208	0.059102	0	0	0	1.21125	0
GNC74(43) Dorsal	25.563	1.77935	34.4171	5.01035	14.3759	1.90632	0	0	0	15.6418	0	0	0.0968636	0.122586	0	0	0	1.08668	0
